# Supplementary material for: Structure of the Michaelis complex of β-mannosidase, Man2A, provides insight into the conformational itinerary of mannoside hydrolysis
Source: Royal Society of Chemistry journal article supplement (doi:10.1039/b902240f), 2009-01-01
Supplement: b902240f.pdf [file b902240f.pdf]

SUPPLEMENTARY MATERIAL FOR

## Structure of the Michaelis complex of $\beta$ -mannosidase, Man2A, provides insight into the conformational itinerary of mannoside hydrolysis

Wendy A Offen,<sup>a</sup> David L Zechel<sup>b</sup> Stephen G Withers<sup>c</sup> Harry J Gilbert<sup>d</sup> and Gideon J Davies<sup>a,\*</sup>

### Synthesis of Reagents

#### 2,4-Dinitrophenyl 3,4,6-tri-O-acetyl-2-deoxy-2-fluoro- $\beta$ -D-mannopyranoside

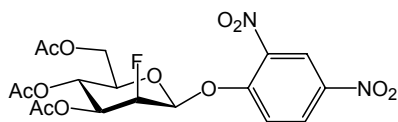

3,4,6-Tri-O-acetyl-D-glucal (5.62 g, 20.6 mmol) was dissolved in 3:1 DMF / H<sub>2</sub>O (200 mL) followed by Selectfluor<sup>TM</sup> (10.5 g, 29.7 mmol, 1.4 eq.) and the whole mixture stirred overnight at 50°C. TLC analysis (1:1 PE/EtOAc) indicated complete conversion of the D-glucal to 2-deoxy-2-fluoro hexopyranoses at this time. The solvent was evaporated and the residue redissolved in EtOAc (300 mL), washed with brine and water, and then dried over MgSO<sub>4</sub>. The solvent was evaporated and the crude, without further purification, re-dissolved in DMF (200 mL). DABCO (7.0 g, 62.4 mmol, ~ 3 eq.) was added and dissolved, followed by 2,4-dinitrofluorobenzene (6.0 g, 32.2 mmol, ~ 1.5 eq.). The vessel was purged with argon and stirred in the dark overnight at room temperature, whereupon TLC analysis (3:4 EtOAc / PE) indicated complete conversion to 2,4-dinitrophenyl 2-deoxy-2-fluoro-glycosides. The solvent was evaporated and the residue redissolved in EtOAc (300 mL). The solution was washed with 0.2 M H<sub>2</sub>SO<sub>4</sub>, saturated sodium bicarbonate and water. The organic layer was then dried over MgSO<sub>4</sub> then evaporated to afford a dark brown oil. Chromatography on silica gel (4:3 to 1:1 EtOAc / PE) and evaporation of the solvent afforded the alpha (1.49 g, 3.13 mmol, 15.1%) and beta (1.55 g, 3.26 mmol, 15.7%,  $\beta/\alpha = 1:1$ ) anomers of the protected 2,4-dinitrophenyl 2-fluoro-mannosides, and an anomeric mixture of the protected 2,4-dinitrophenyl 2-fluoro-glucosides (2.58 g, 5.43 mmol, 26%,  $\beta/\alpha = 3.7:1$  by <sup>19</sup>F NMR) as pale yellow crystalline solids. <sup>1</sup>H and <sup>19</sup>F NMR spectral data matched that reported previously (Ref 1S).

**Data for 2,4-Dinitrophenyl 3,4,6-tri-O-acetyl-2-deoxy-2-fluoro- $\beta$ -D-mannopyranoside:** Rf (3:4 EtOAc / PE) = 0.20; M.p. = 189.5-190.5°C; <sup>1</sup>H NMR (400 MHz, CDCl<sub>3</sub>):  $\delta$  8.74 (d, 1 H,  $J = 2.5$  Hz, H-3 Ph), 8.42 (dd, 1 H,  $J = 2.5, 9.2$  Hz, H-5 Ph), 7.48 (d, 1 H,  $J = 9.5$  Hz, H-6 Ph), 5.38 (dd, 1 H,  $J = 14.6, < 1$  Hz, H-1), 5.37 (dd, 1 H,  $J = 9.5, 9.5$  Hz, H-4), 5.14 (ddd, 1 H,  $J = 24.3, 9.1, 2.6$  Hz, H-3), 5.12 (ddd, 1 H,  $J = 51.4, 2.5, < 1$  Hz, H-2), 4.27 (apparent d, 2 H,  $J = 4.4$  Hz, H-6<sub>a,b</sub>), 3.87 (ddd, 1 H,  $J = 4.4, 4.4, 8.8$  Hz, H-5), 2.14, 2.07, 2.06 (all s, 9 H, 3  $\times$  OAc); <sup>19</sup>F NMR (188.3 MHz, CDCl<sub>3</sub>, referenced to CF<sub>3</sub>CO<sub>2</sub>H):  $\delta$  -142.4 (ddd,  $J_{F,H} = 50.3, 24.4, 15.2$  Hz); <sup>13</sup>C NMR (100 MHz, CDCl<sub>3</sub>):  $\delta$  170.4, 170.0, 169.2 (3  $\times$  CH<sub>3</sub>CO), 153.5, 142.6, 140.7 (3  $\times$  C-Ph), 128.5, 121.6, 119.9 (3  $\times$  CH-Ph), 97.2 (d,  $J_{C,F} = 16.7$  Hz, C-1), 85.7 (d,  $J_{C,F} = 194.7$  Hz, C-2), 73.3 (C-5), 70.2 (d,  $J_{C,F} = 17.2$  Hz, C-3), 65.5 (C-4), 61.9 (C-6), 20.6 (3 lines, 3  $\times$  CH<sub>3</sub>CO); HRMS (DCI+):  $m/z = 492.1269$ ; calcd. for C<sub>18</sub>H<sub>23</sub>FN<sub>3</sub>O<sub>12</sub> [M + NH<sub>4</sub>]<sup>+</sup>:  $m/z = 492.1266$ ; Anal. calcd. for C<sub>18</sub>H<sub>19</sub>FN<sub>2</sub>O<sub>12</sub> (474.35): C, 45.58; H, 4.04; N, 5.91; Found: C, 45.68; H, 4.15; N, 6.03.

**Data for 2,4-Dinitrophenyl 3,4,6-tri-O-acetyl-2-deoxy-2-fluoro- $\alpha$ -D-mannopyranoside:** Rf (3:4 EtOAc / PE) = 0.70; M.p. = 217-219°C; <sup>1</sup>H NMR (200 MHz, CDCl<sub>3</sub>):  $\delta$  8.80 (d, 1 H,  $J = 2.7$  Hz, H-3 Ph), 8.45 (dd, 1 H,  $J = 2.7, 9.3$  Hz, H-5 Ph), 7.54 (d, 1 H,  $J = 9.3$  Hz, H-6 Ph), 5.92 (dd, 1 H,  $J = 1.9, 6.1$  Hz, H-1), 5.47 (dd, 1 H,  $J = 10.0, 10.0$  Hz, H-4), 5.41 (ddd,  $J = 2.2, 10.0, 29.5$  Hz, H-3), 5.08 (ddd, 1 H,  $J = 2.1, 2.1, 48.8$  Hz, H-2), 4.25 (dd, 1 H,  $J = 5.1, 12.7$  Hz, H-6<sub>a</sub>), 4.07 (m, 2 H, H-5, H-6<sub>b</sub>), 2.11, 2.05, 2.03 (all s, 9 H,

3 × OAc);  $^{19}\text{F}$  NMR (188.3 MHz,  $\text{CDCl}_3$ , referenced to  $\text{CF}_3\text{CO}_2\text{H}$ ):  $\delta$  -129.5 (ddd,  $J_{F,H}$  = 48.8, 29.0, 6.1 Hz); HRMS (DCI+):  $m/z$  = 492.1262; ; calcd. for  $\text{C}_{18}\text{H}_{23}\text{FN}_3\text{O}_{12}$  [ $\text{M} + \text{NH}_4$ ] $^+$ :  $m/z$  = 492.1266.

**2,4-Dinitrophenyl 2-deoxy-2-fluoro- $\beta$ -D-mannopyranoside**

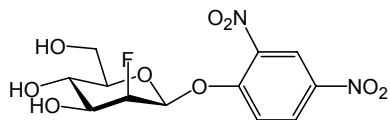

The per-*O*-acetate (1.69 g, 3.57 mmol) was suspended in dry MeOH (50 mL) and cooled to 0°C under argon. Acetyl chloride (2 mL) was added dropwise to afford a 4% solution of HCl. The mixture was stirred for 2 days at 4°C. The solvent was evaporated followed by repeated evaporation of dry diethyl ether from the residue to remove excess HCl. The crude was columned on silica gel (95:5 EtOAc/MeOH). Subsequent evaporation of the solvent and recrystallization of the residue from acetone / PE to afforded white needles (1.08 g, 3.10 mmol, 87%). R<sub>f</sub> (30:2:1 EtOAc/MeOH/H<sub>2</sub>O = 0.50;  $^1\text{H}$  NMR (400 MHz, D<sub>2</sub>O):  $\delta$  8.95 (d, 1 H,  $J$  = 2.8 Hz, H-3 Ph), 8.59 (dd, 1 H,  $J$  = 2.8, 9.4 Hz, H-5 Ph), 7.67 (d, 1 H,  $J$  = 9.6 Hz, H-6 Ph), 5.82 (dd, 1 H,  $J$  = 18.4, < 1 Hz, H-1), 5.19 (ddd, 1 H,  $J$  = 51.5, 2.2, < 1 Hz, H-2), 4.05 (dd, 1 H,  $J$  = 2.2, 12.5 Hz, H-6a), 3.96 (ddd, 1 H,  $J$  = 30.1, 9.4, 2.4 Hz, H-3), 3.87 (dd, 1 H,  $J$  = 5.9, 12.5 Hz, H-6b), 3.84 (ddd,  $J$  = 1.1, 9.7, 9.7 Hz, H-4), 3.78 (m, 1 H, H-5);  $^{19}\text{F}$  NMR (188 MHz, D<sub>2</sub>O, ref. to  $\text{CF}_3\text{CO}_2\text{H}$ ):  $\delta$  -144.8 (ddd,  $J$  = 48.8, 29.2, 18.4 Hz);  $^{13}\text{C}$  NMR (100 MHz, D<sub>2</sub>O):  $\delta$  154.1, 142.0, 139.1 (C-1', 2', 4'), 130.1, 122.5, 118.1 (C-3', 5', 6'), 96.9 (d,  $J_{C,F}$  = 14.9 Hz, C-1), 90.2 (d,  $J_{C,F}$  = 183.9 Hz, C-2), 77.1 (C-5), 71.7 (d,  $J_{C,F}$  = 17.5 Hz, C-3), 66.6 (C-4), 60.7 (C-6). Anal. calcd. for  $\text{C}_{12}\text{H}_{13}\text{FN}_2\text{O}_9$  (348.24) + 0.4 mol acetone: C, 42.92; H, 4.87; N, 7.59. Found: C, 42.92; H, 4.27; N, 7.26.

**References:**

1S. Ortner, J.; Albert, M.; Weber, H.; Dax, K. *J. Carbohydr. Chem.* **1999**, *18*, 297-316.
